# Supplementary material for: A fluorine-mediated hydrothermal method to synthesize mesoporous rhombic ZnO nanorod arrays and their gas sensor application
Source: Royal Society of Chemistry journal article supplement (doi:10.1039/c3dt51994e), 2013-01-01
Supplement: c3dt51994e.pdf [file c3dt51994e.pdf]

## † Electronic supplementary information

### A fluorine-mediated hydrothermal method to synthesize mesoporous rhombic ZnO nanorod arrays and their gas sensor application

*Zhen Wen, Liping Zhu\*, Lei Li, Luwei Sun, Hui Cai, Zhizhen Ye*

State Key Laboratory of Silicon Materials, Department of Materials Science and Engineering, Cyrus Tang Center for Sensor Materials and Applications, Zhejiang University, Hangzhou, 310027, P.R. China.

Tel: +86-571-87953139; Fax: +86-571-87952625; E-mail: [zlp1@zju.edu.cn](mailto:zlp1@zju.edu.cn)

### Experimental section

The crystal phase identification of both the precursor and annealed products were investigated by X-ray diffraction (XRD, Bede D1) system with Cu- $K\alpha$  radiation ( $\lambda = 0.15406$  nm) over the  $2\theta$  range of  $10-80^\circ$ . The morphologies were investigated using field emission scanning electron microscopy (FESEM, Hitachi S-4800) with an accelerating voltage of 5 kV. Specific surface areas were computed from the results of  $N_2$  physisorption at 77 K (TriStar II 3020) by using the BET (Brunauer-Emmet-Teller) and BJH (Barrett-Joyner-Halenda). Further structural analysis of individual NR was carried out using high-resolution transmission electron microscopy (HRTEM, FEI F20) with an accelerating voltage of 200 kV. X-ray photoelectron spectroscopy (XPS, Thermo ESCALAB 250) measurement was performed with a monochromatic Al- $K\alpha$  ( $h\nu = 1486.6$  eV) X-ray source. The electrical characteristics were measured at room temperature in the dark using a semiconductor parameter analyzer (Agilent E5270B) with the bias voltage range of -10 to 10 V. The gas-sensing properties were performed on an intelligent gas sensing analysis system (CGS-1TP, Beijing Elite Tech Co., Ltd, China). The gas response (S) was designated as the ratio  $R_a/R_g$ , where  $R_g$  was a mixture of target gas and air and  $R_a$  was the sensor resistance in air.

## Figure S1

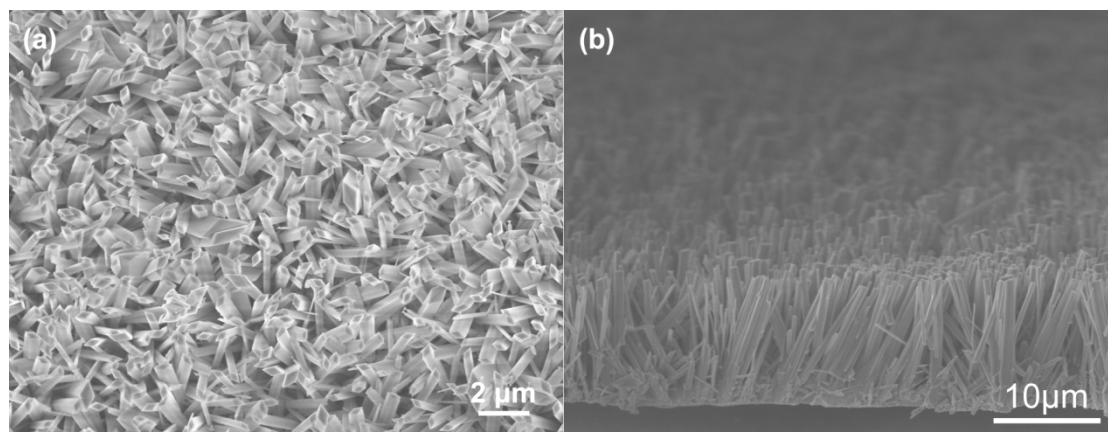

**Fig. S1.** (a) Top view and (b) cross-sectional SEM images of the rhombic ZnO nanorod arrays, respectively.

**Figure S2**

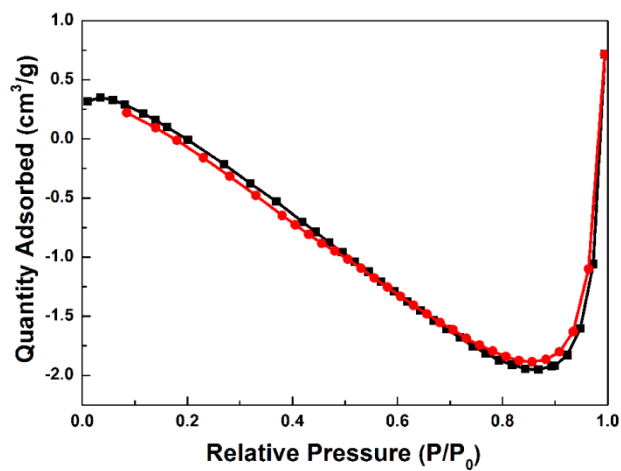

**Fig. S2** N<sub>2</sub> adsorption/desorption isotherm curve of the rhombic Zn(OH)F nanorods.

### Figure S3

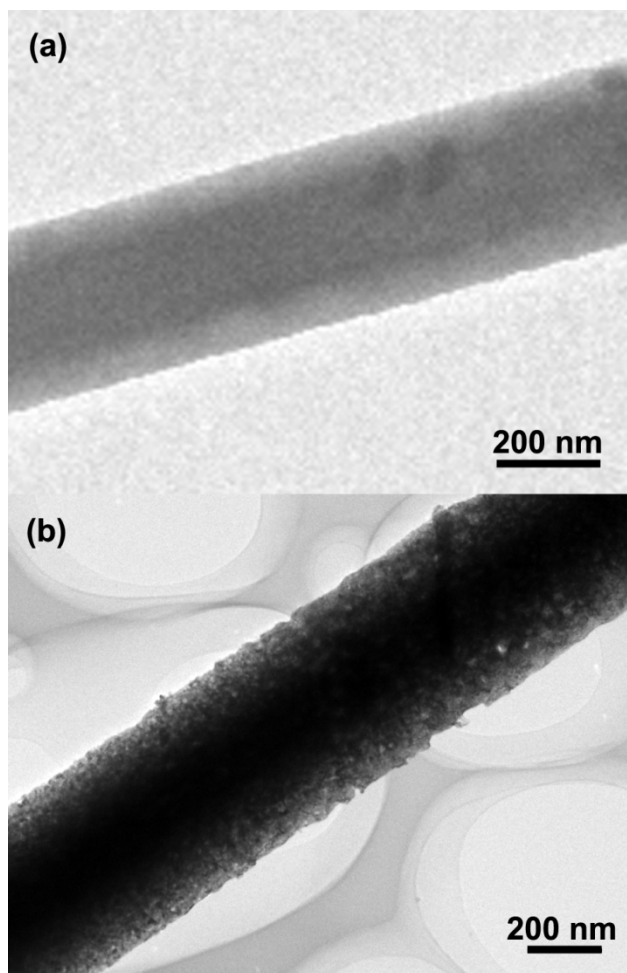

**Fig. S3.** TEM images of the rhombic nanorod: (a) the precursor Zn(OH)F and (b) ZnO after annealed at 450°C.

## Figure S4

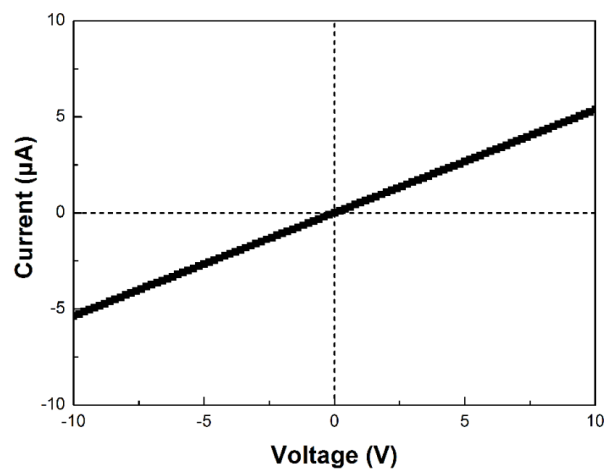

**Fig. S4.** I-V characteristics between the two neighboring electrodes, bridged by the mesoporous rhombic ZnO nanorod arrays, measured in air.
